# Supplementary material
Source: PubMed Central journal article supplement (PMC1937562)

# Angiogenesis Network: all connections dimmed

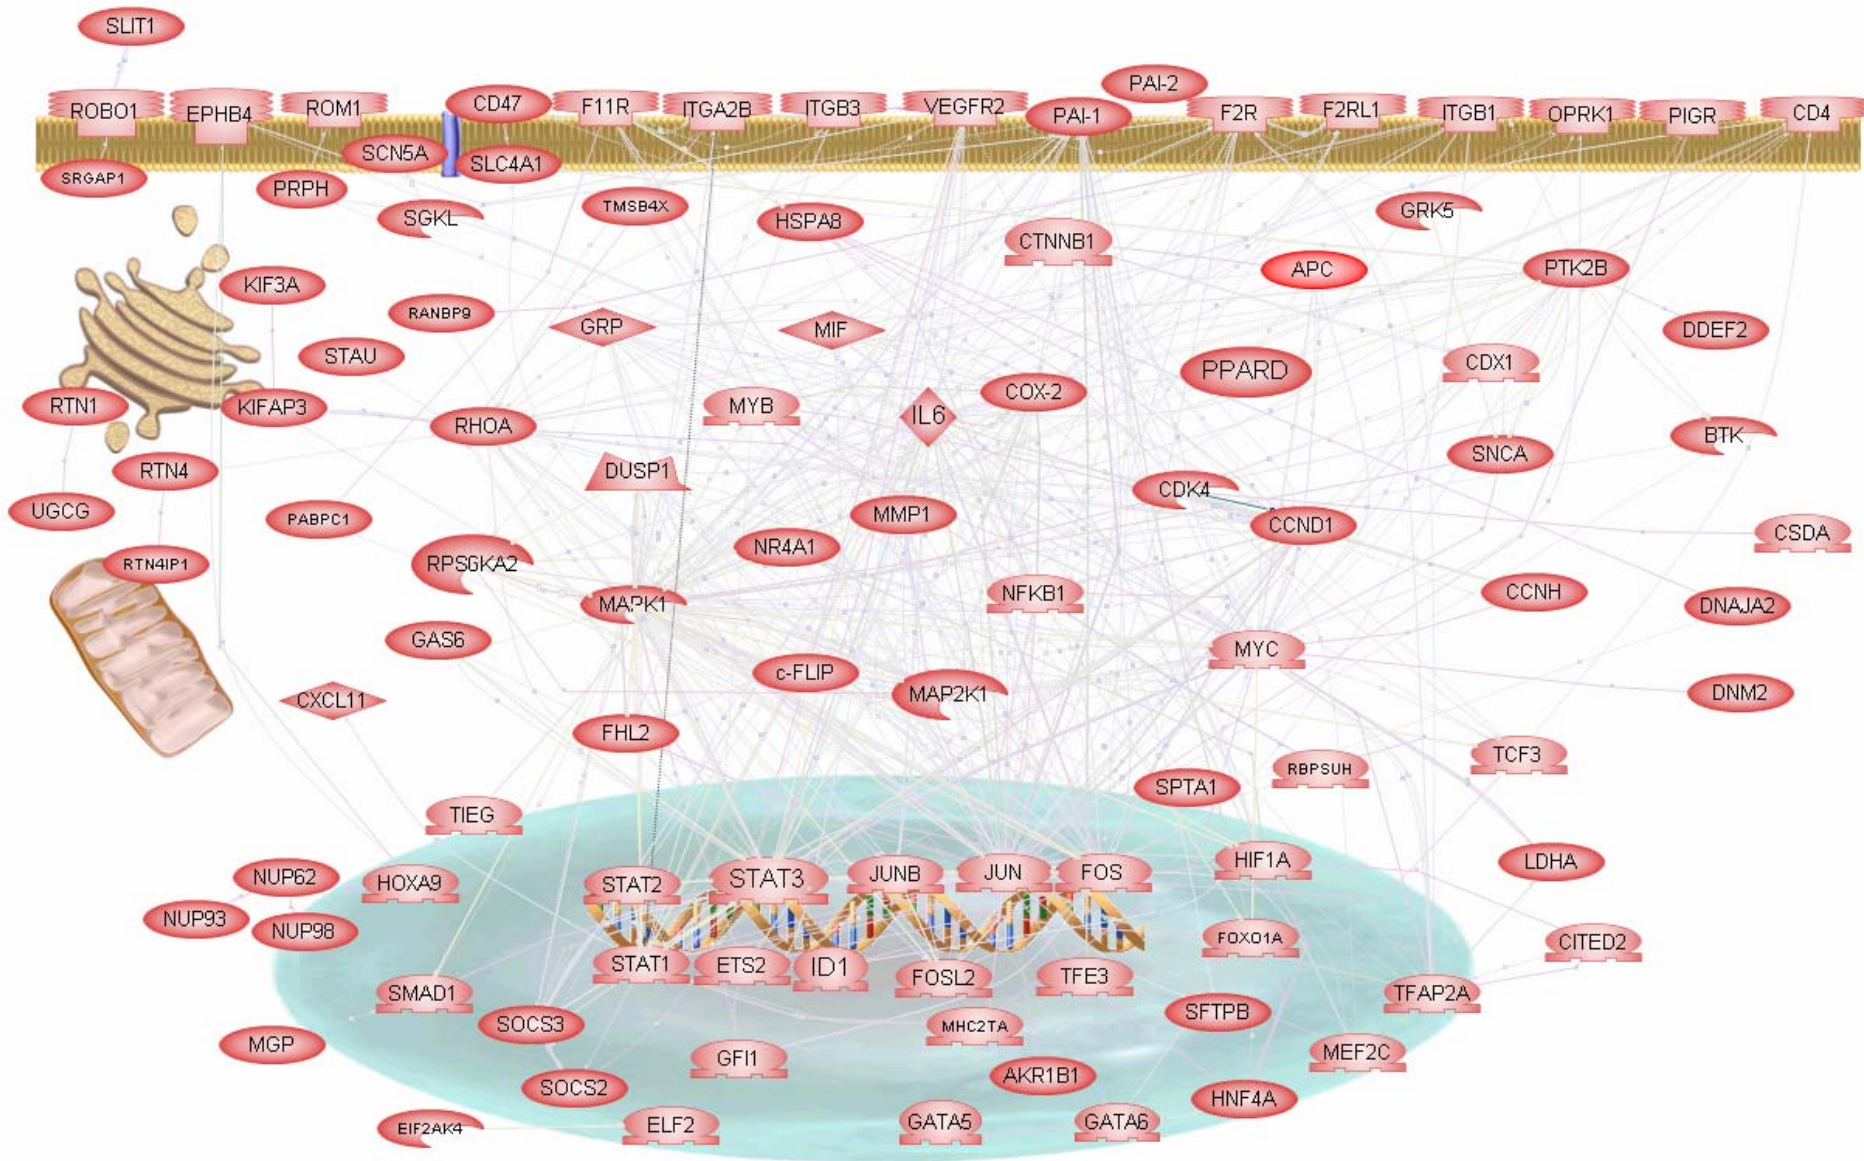

Supplement: pnas_0705505104_1.pdf [file pnas_0705505104_1.pdf]

# Angiogenesis Network: "Jun/Ap1 sub-pathway"

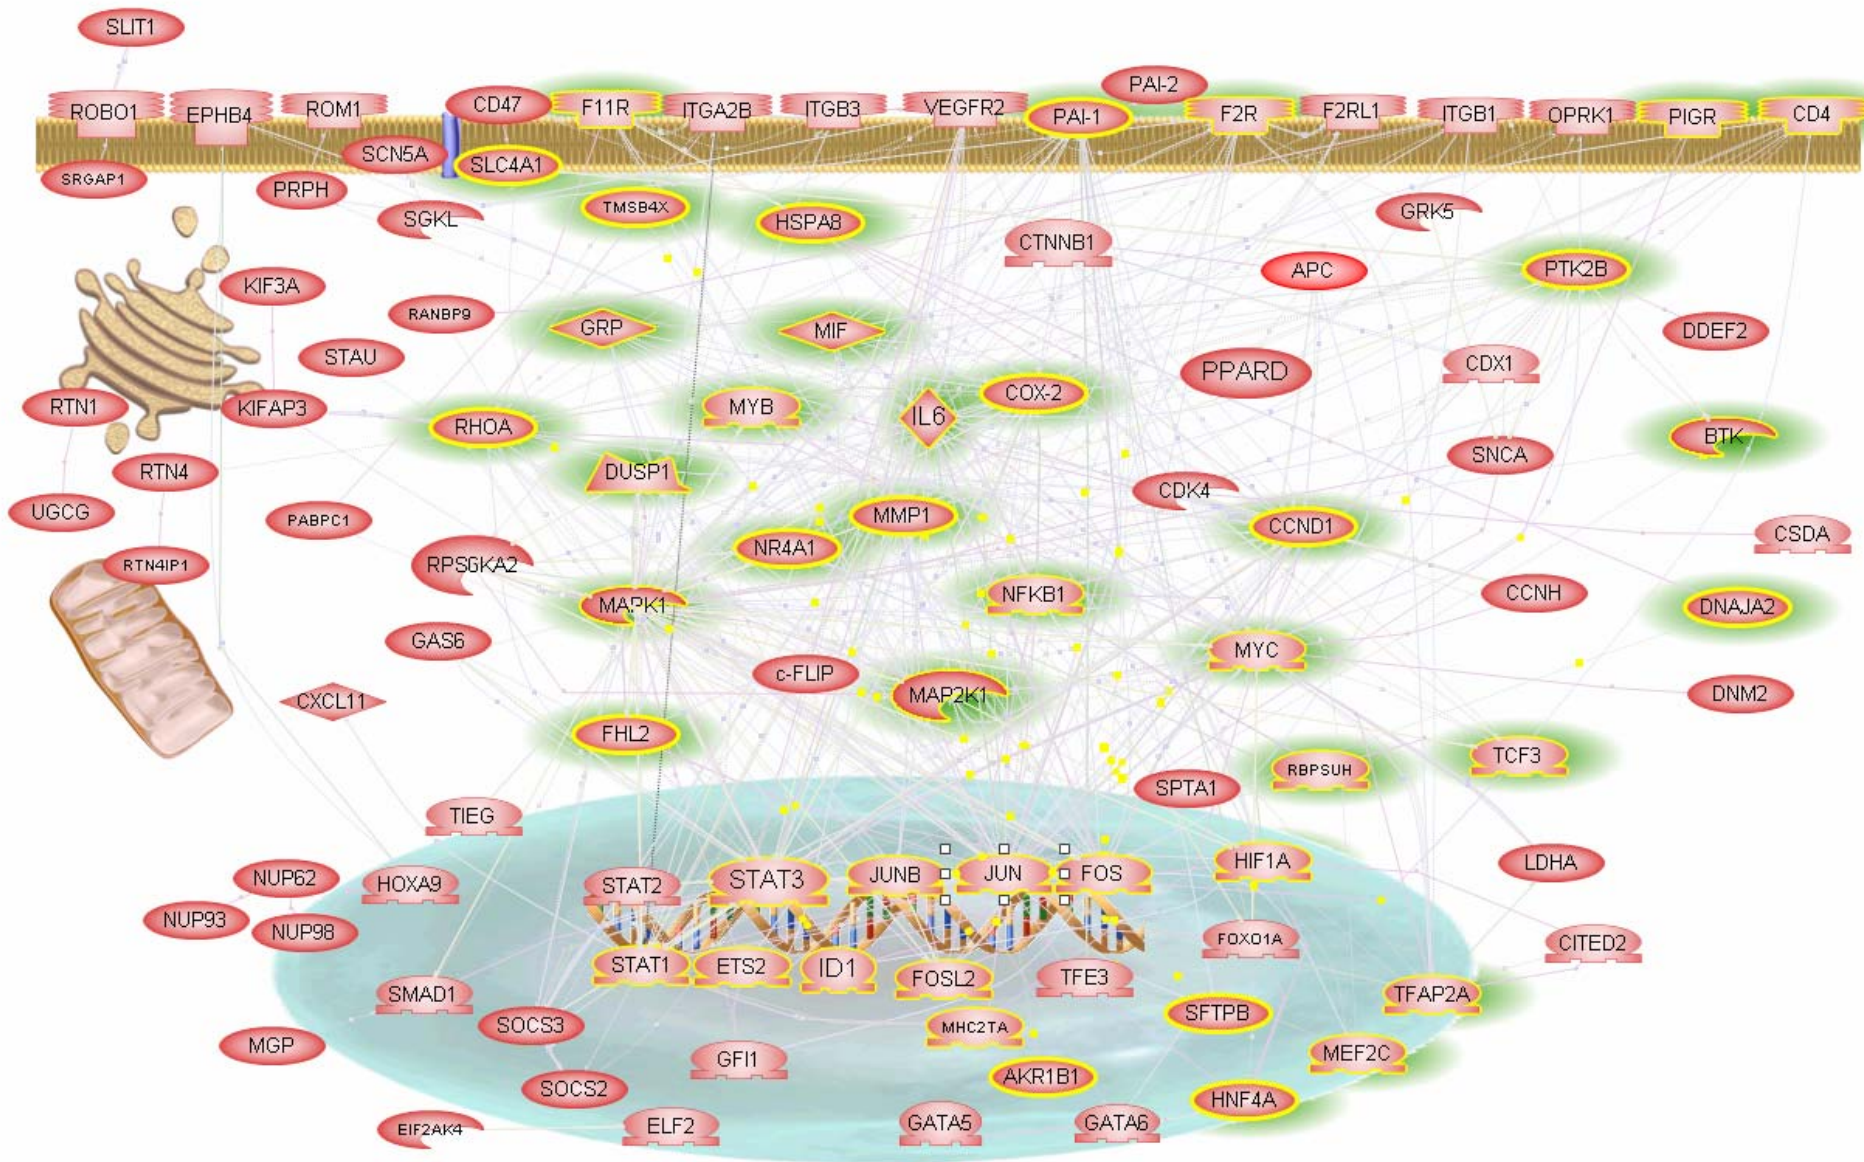

Supplement: pnas_0705505104_10.pdf [file pnas_0705505104_10.pdf]

**A**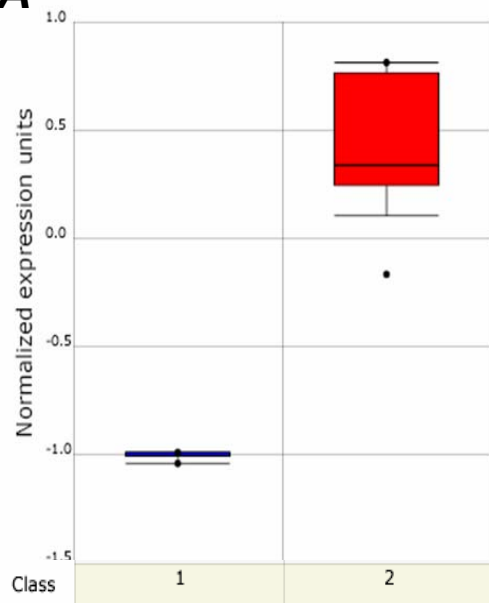**B**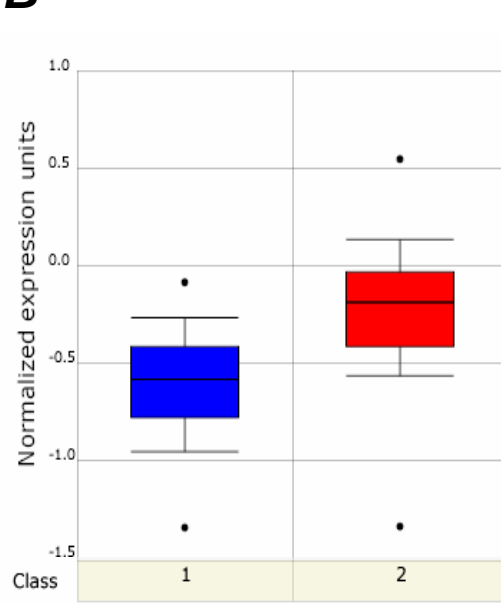**C**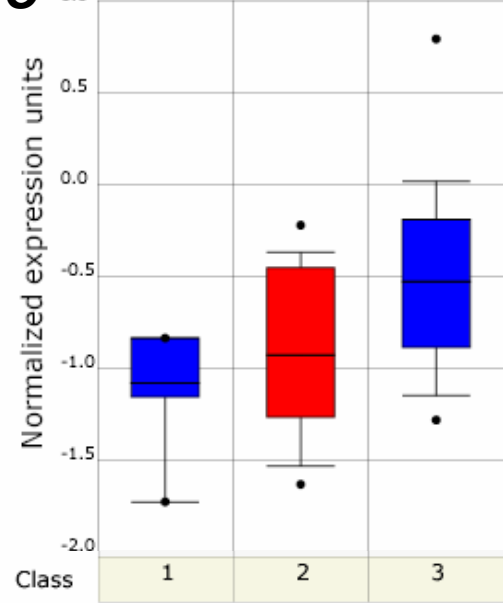**D**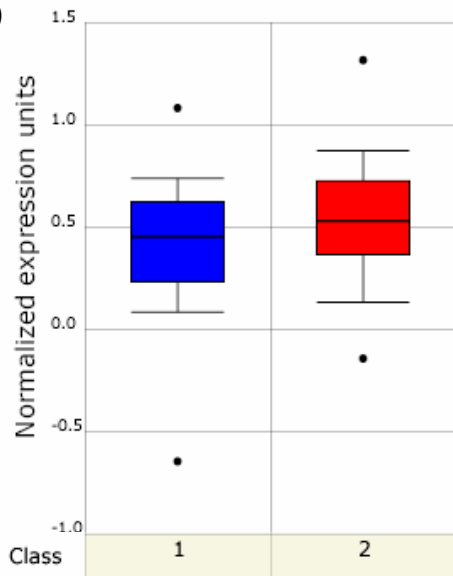**E**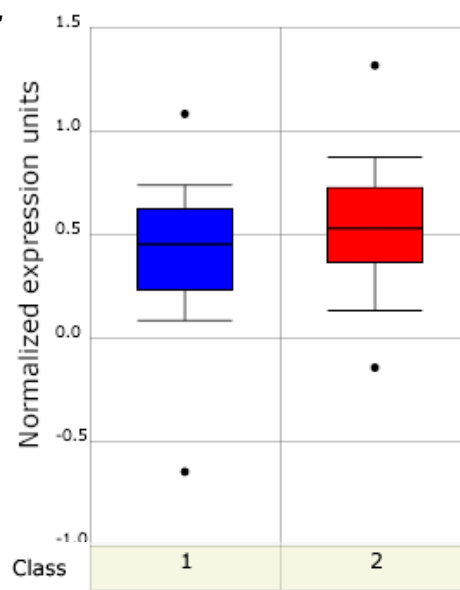

Supplement: pnas_0705505104_11.pdf [file pnas_0705505104_11.pdf]

# Angiogenesis Network: "promotor binding site"

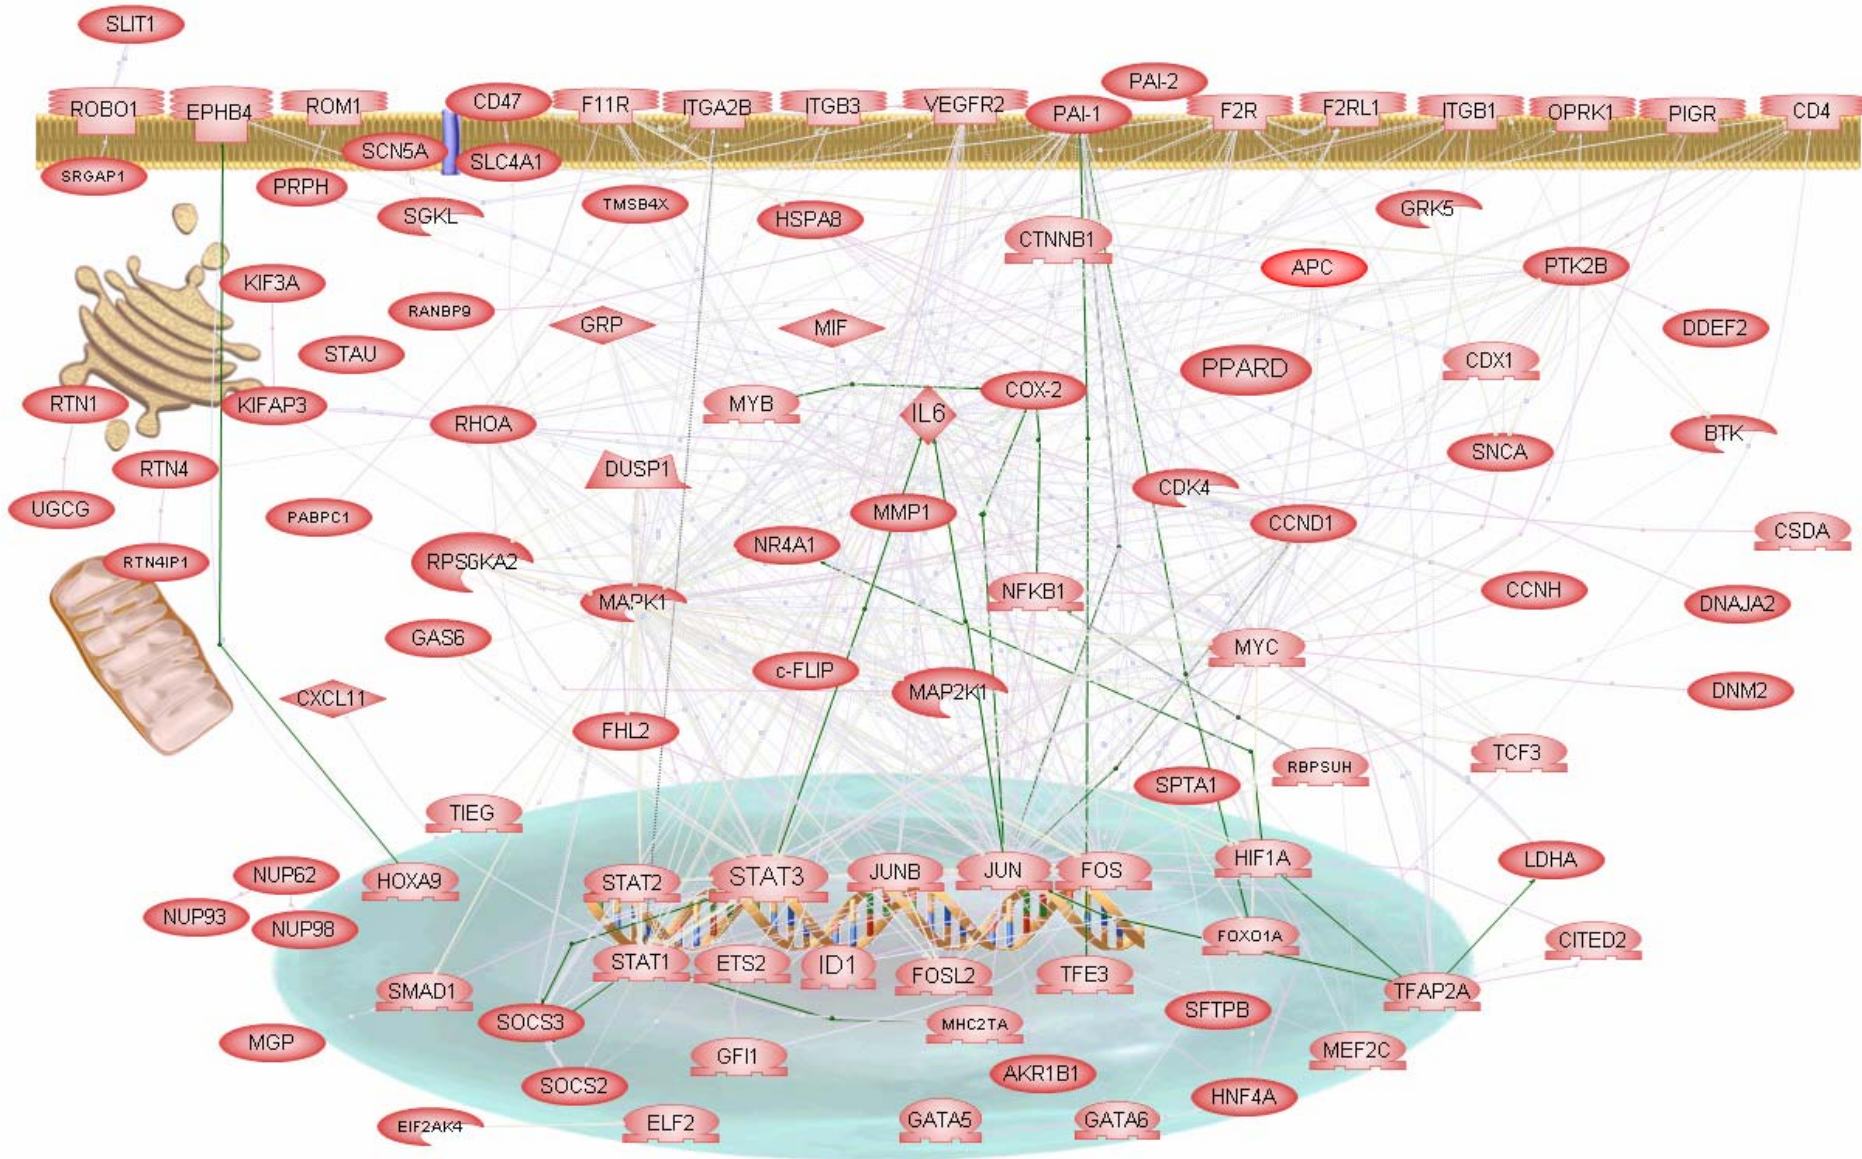

Supplement: pnas_0705505104_2.pdf [file pnas_0705505104_2.pdf]

# Angiogenesis Network: "protein-protein binding"

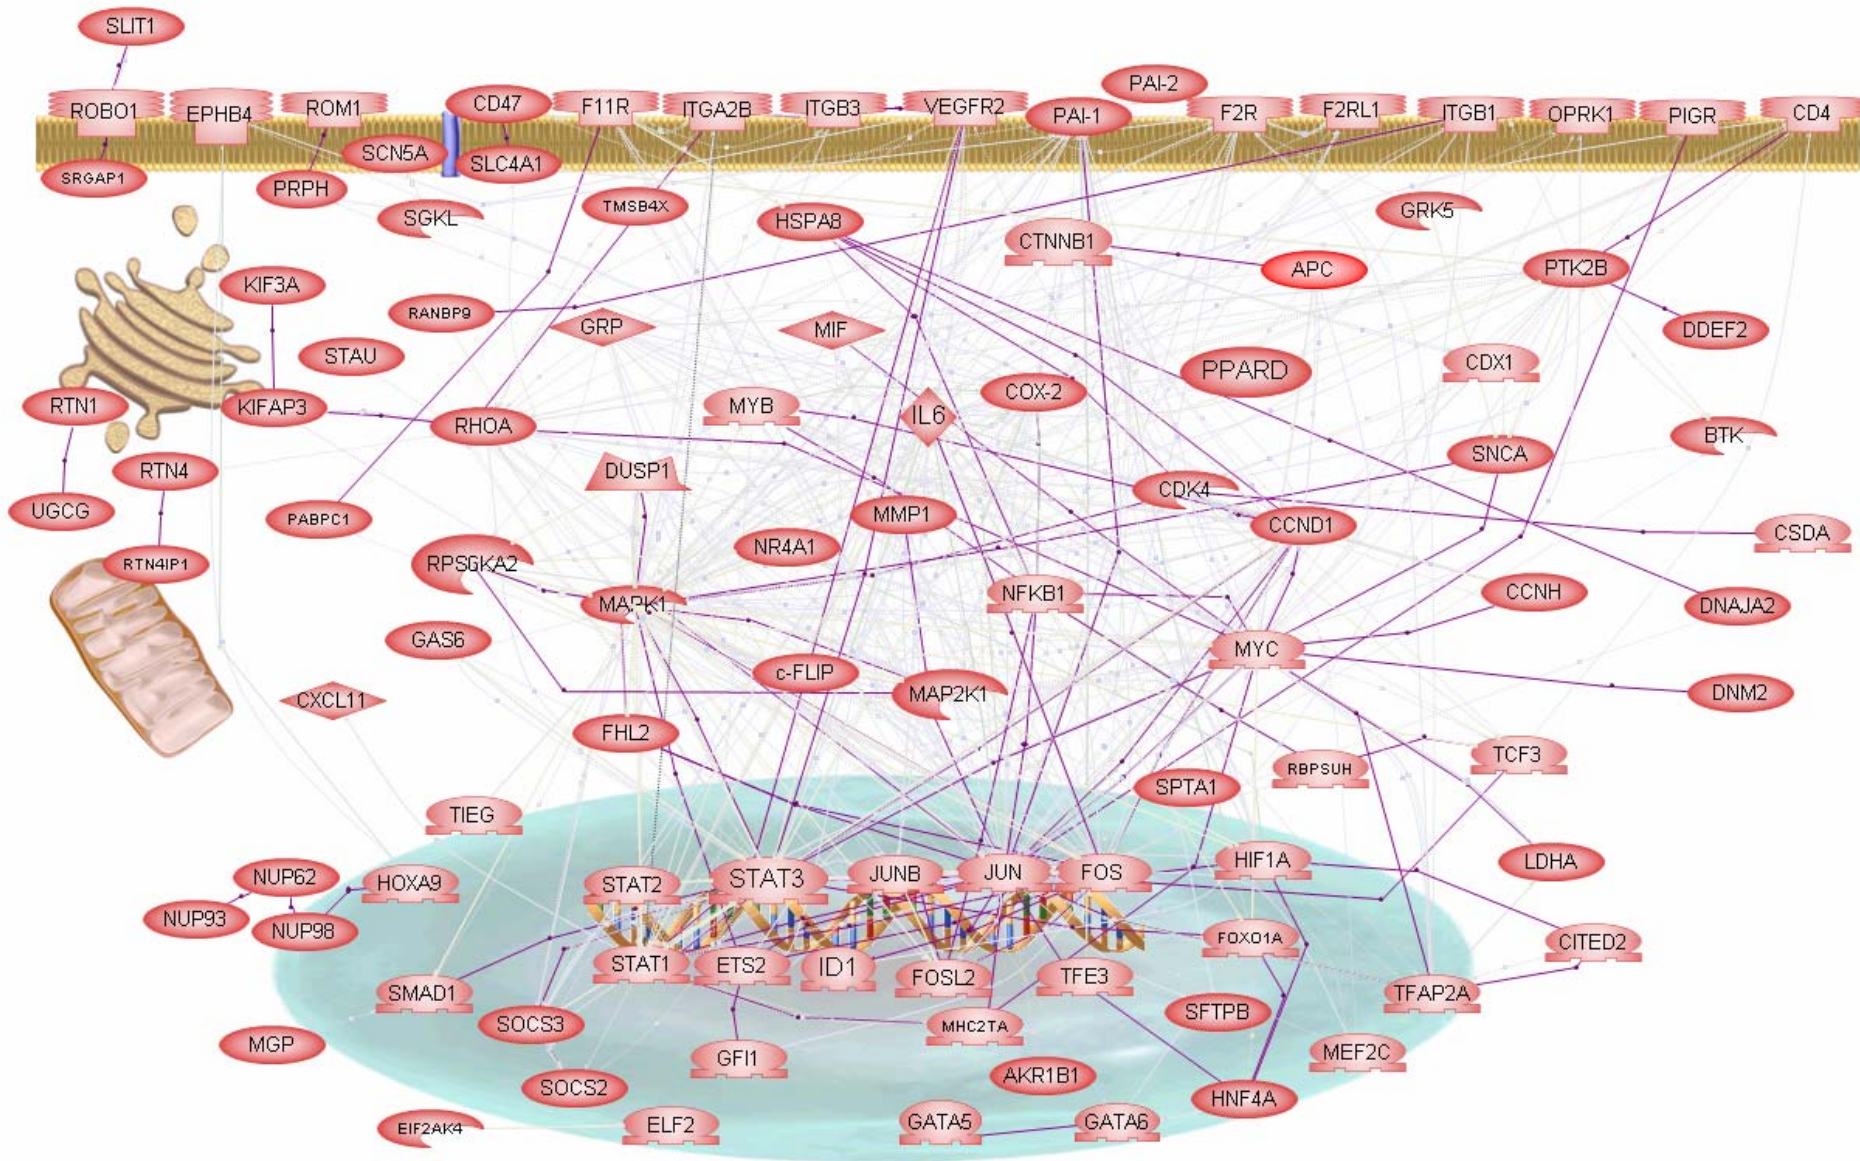

Supplement: pnas_0705505104_4.pdf [file pnas_0705505104_4.pdf]

# Angiogenesis Network: "gene expression"

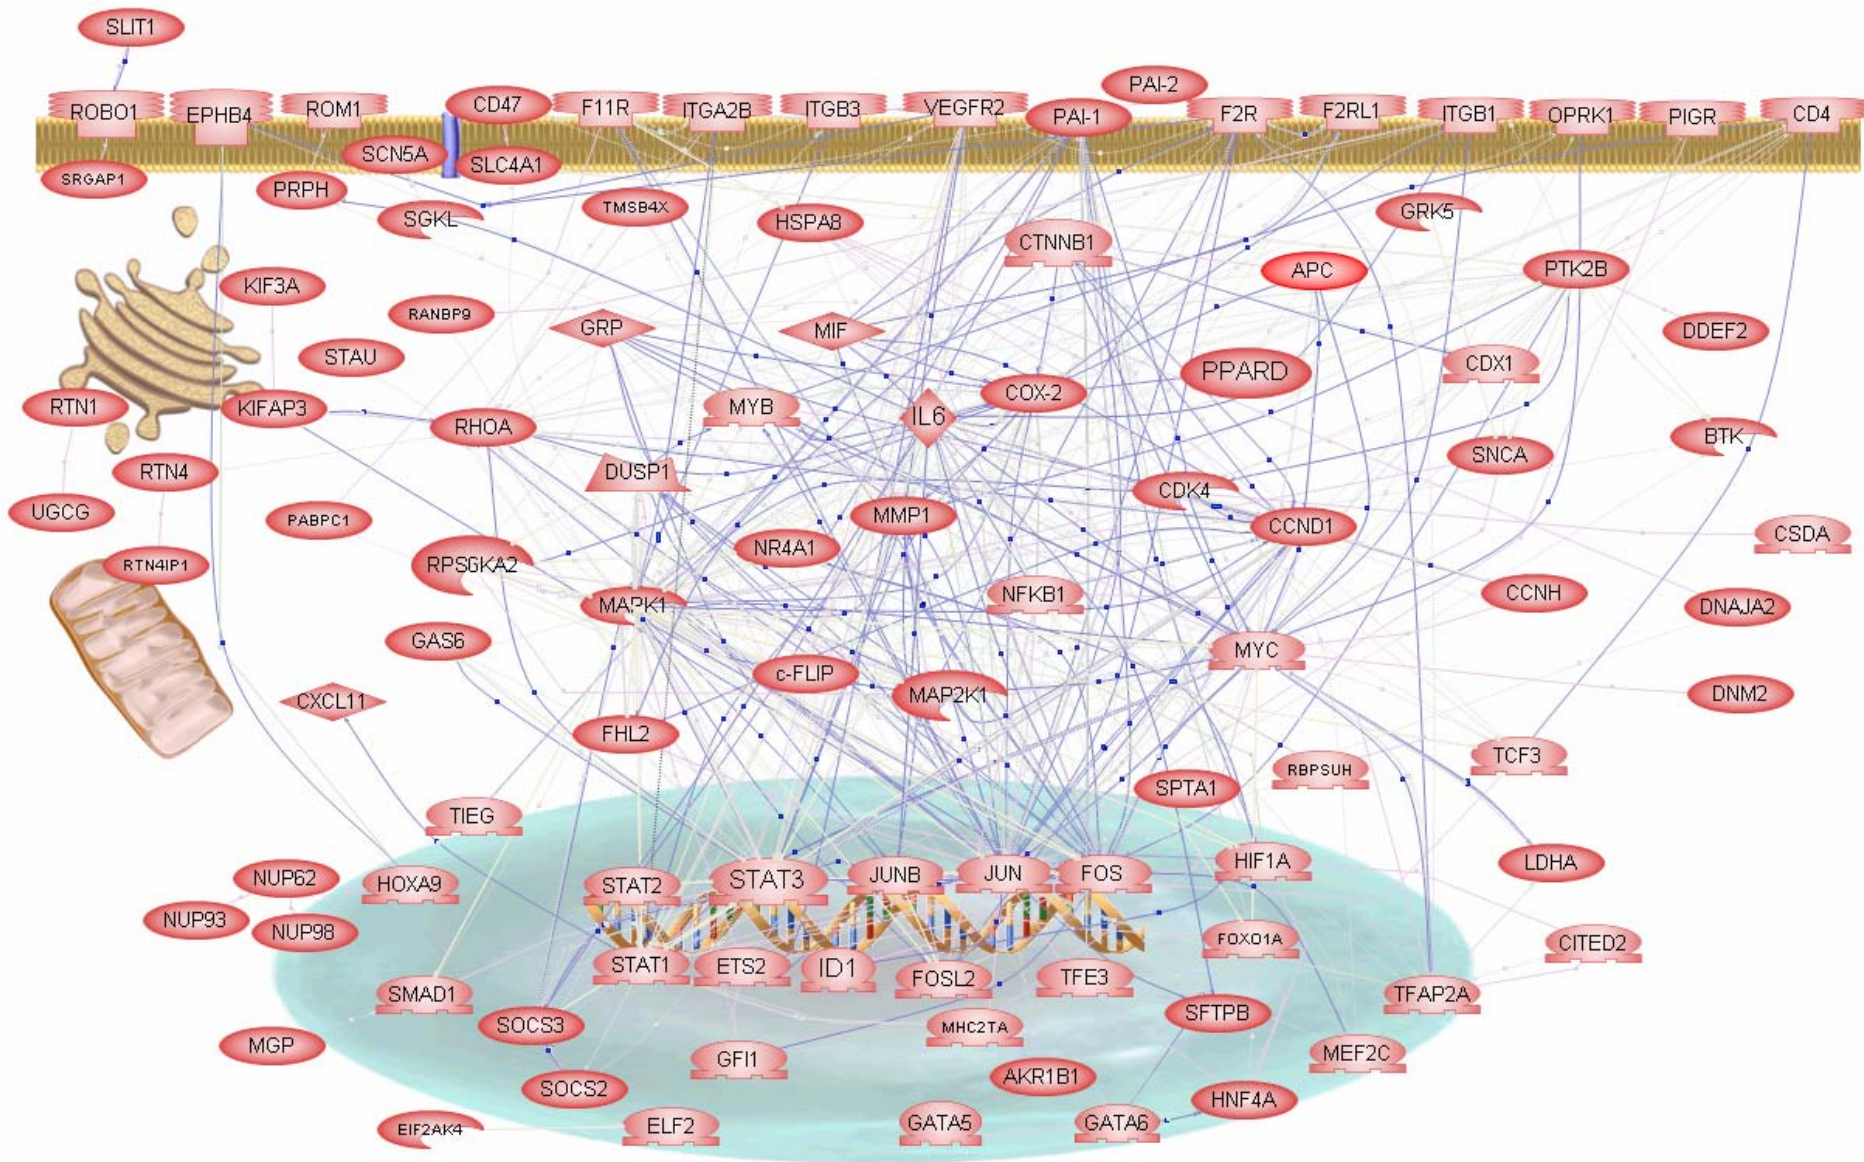

Supplement: pnas_0705505104_5.pdf [file pnas_0705505104_5.pdf]

# Angiogenesis Network: "gene regulation"

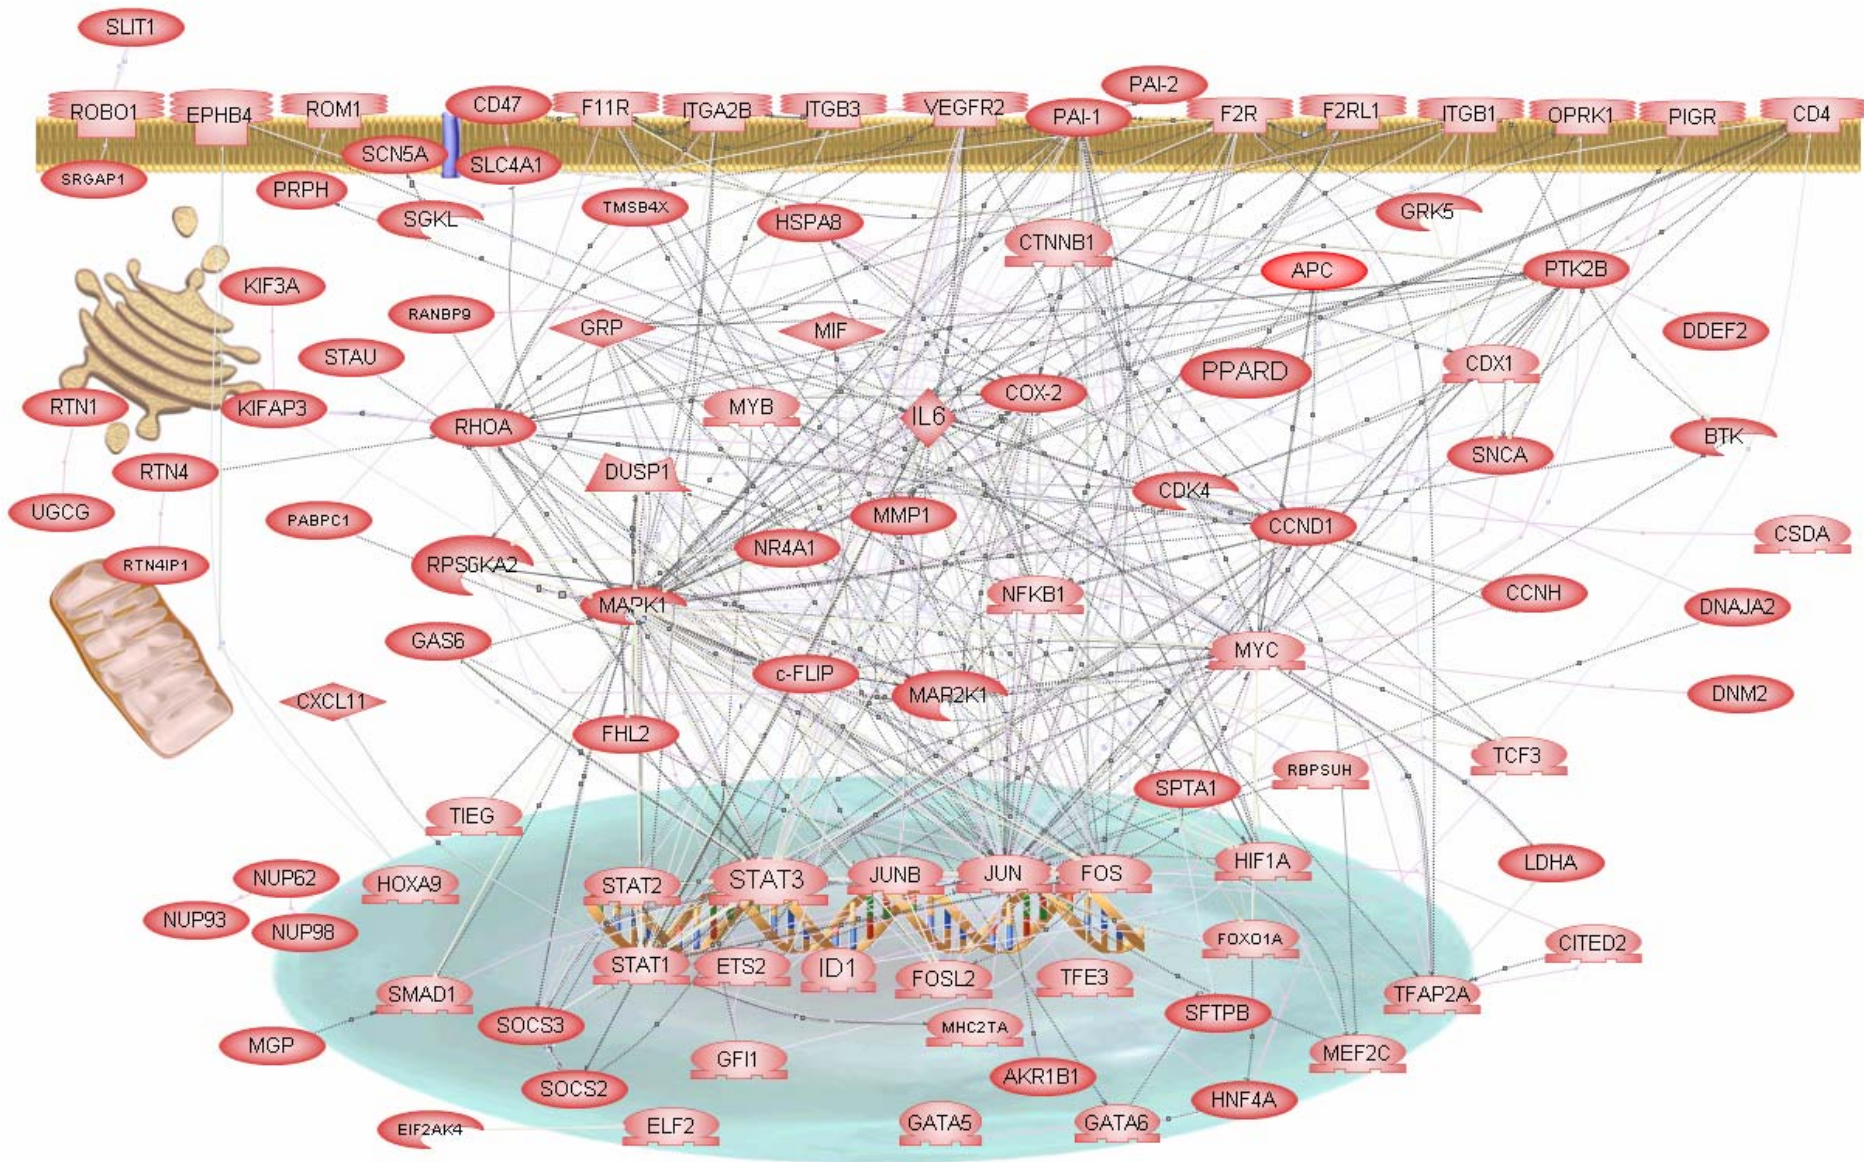

Supplement: pnas_0705505104_6.pdf [file pnas_0705505104_6.pdf]

# Angiogenesis Network: "all interactions included"

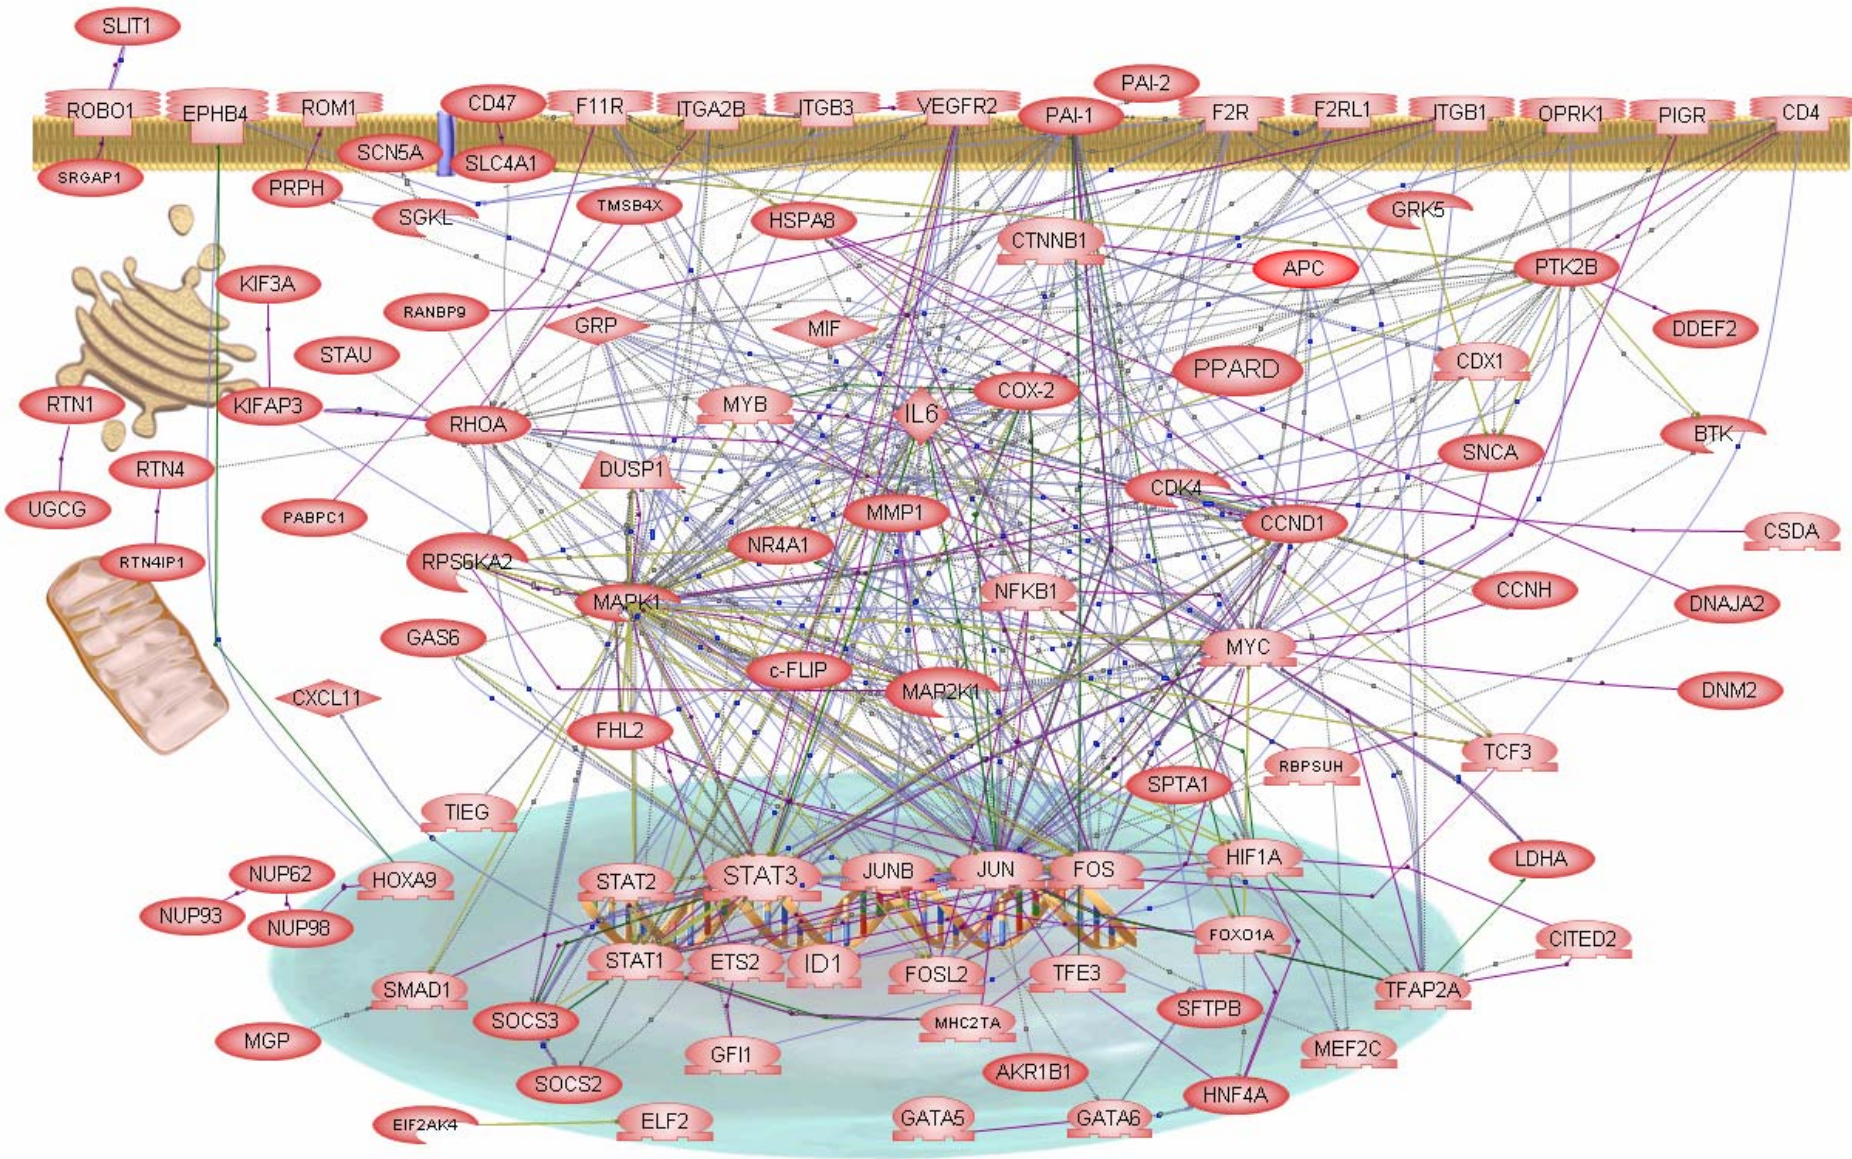

Supplement: pnas_0705505104_7.pdf [file pnas_0705505104_7.pdf]

# Angiogenesis Network: "STAT3 sub-pathway"

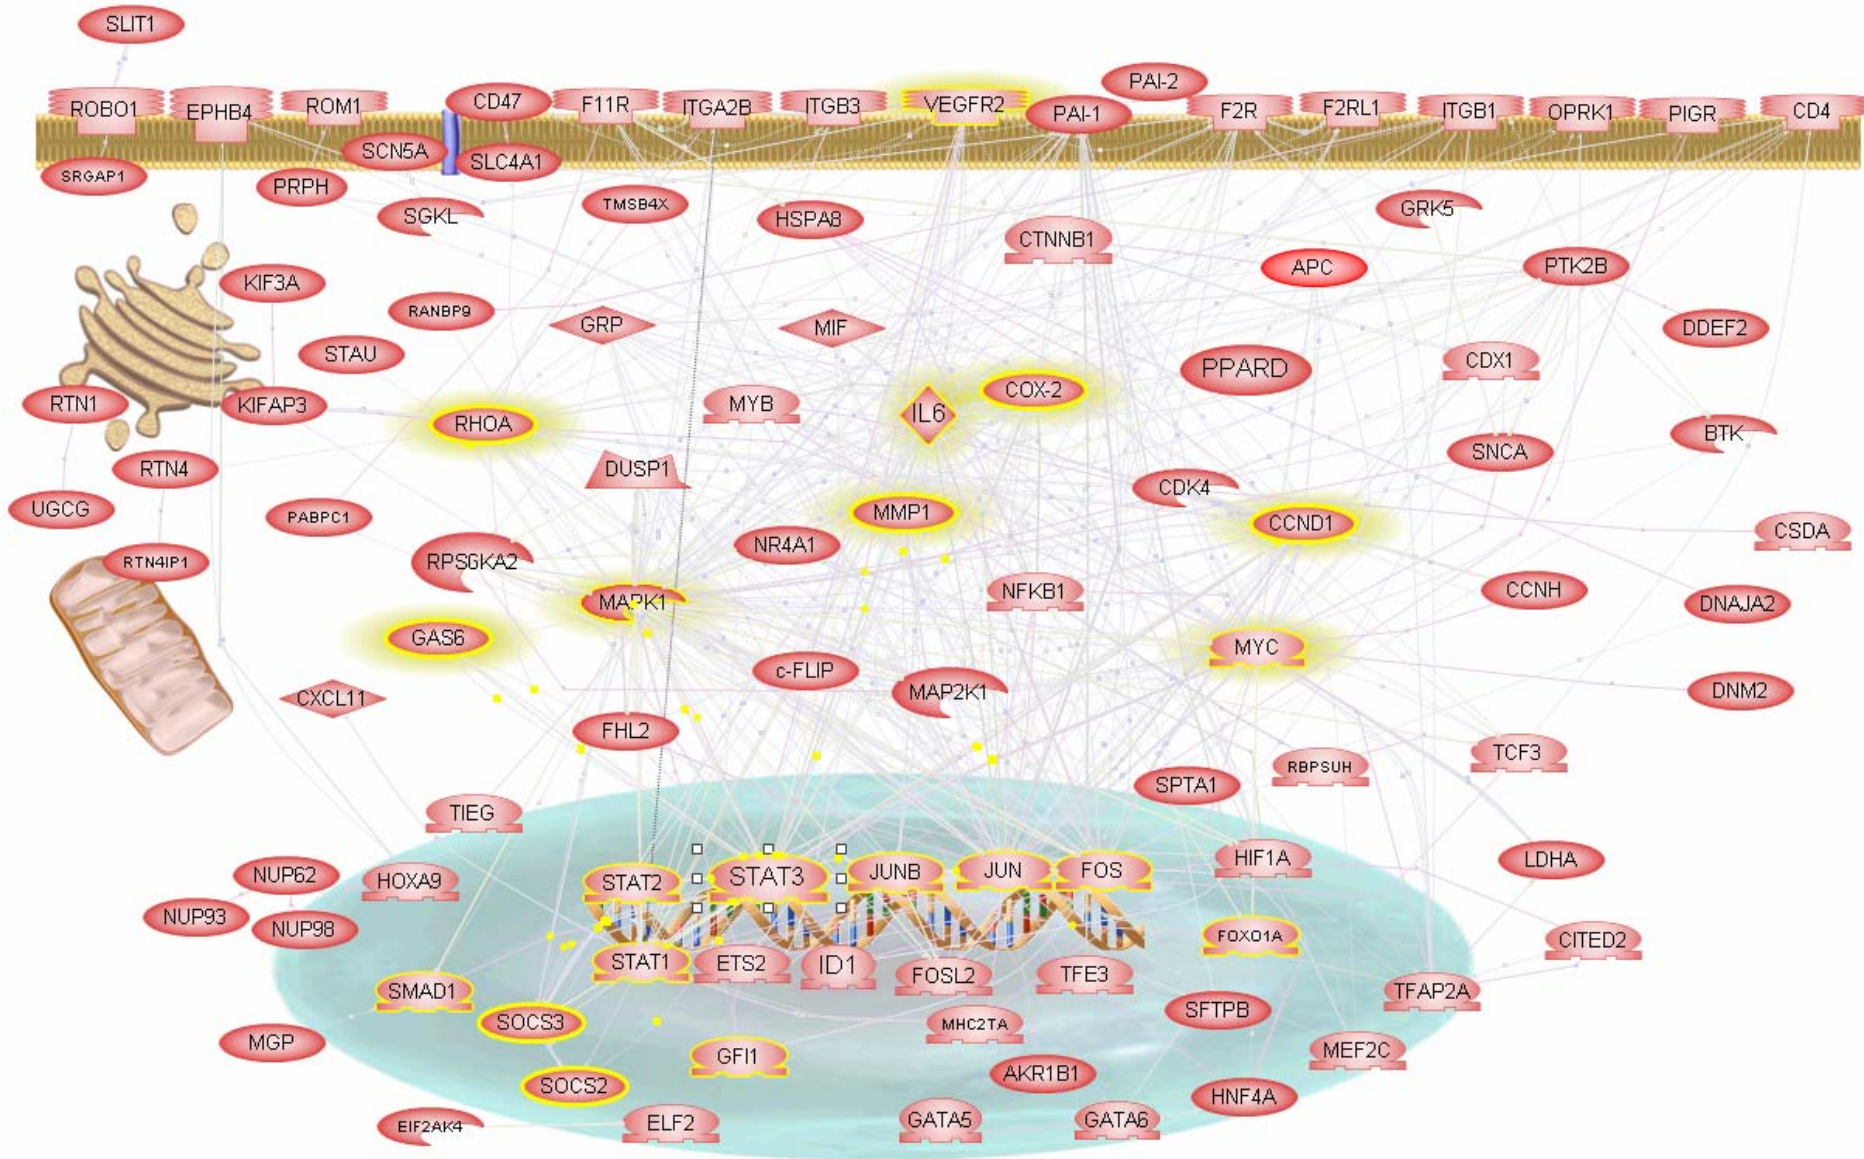

Supplement: pnas_0705505104_8.pdf [file pnas_0705505104_8.pdf]

# Angiogenesis Network: "PPARdelta/Wnt sub-pathway"

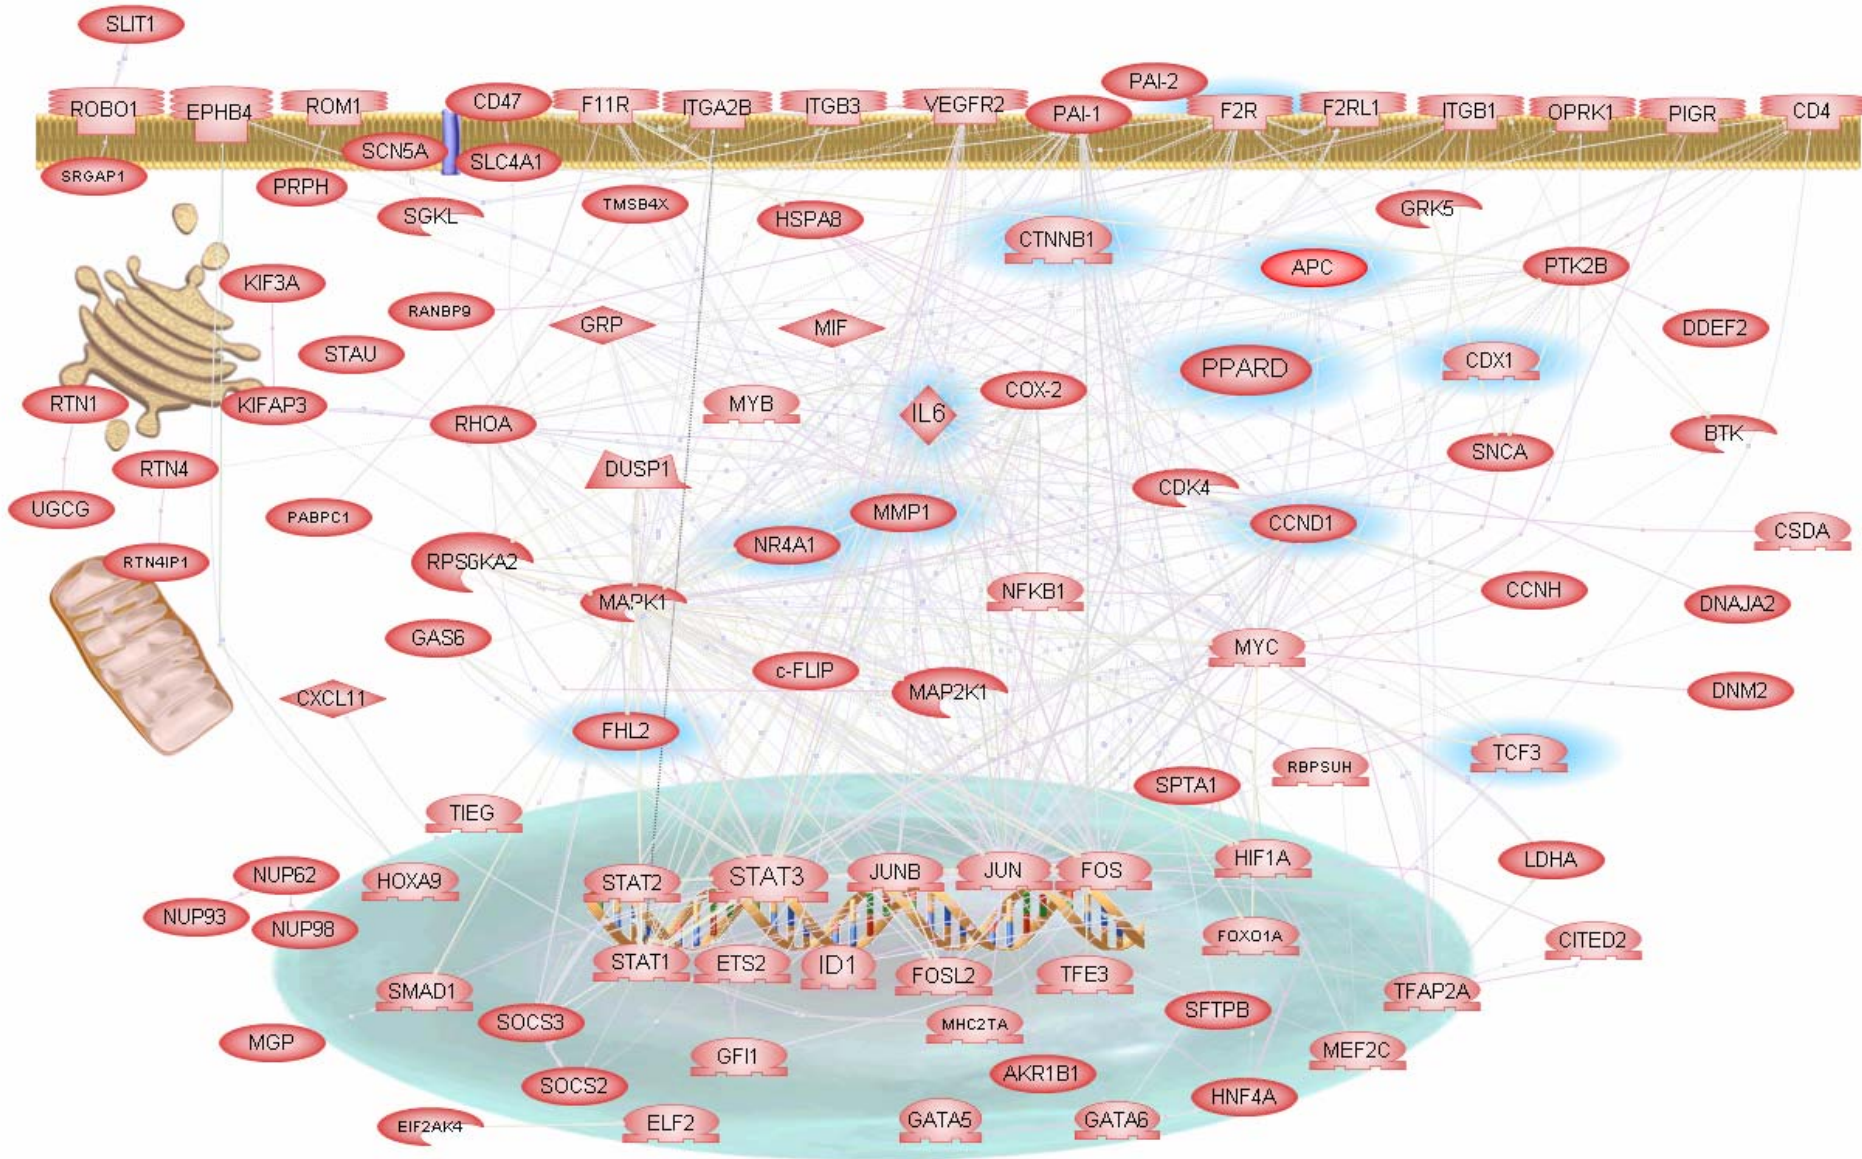

Supplement: pnas_0705505104_9.pdf [file pnas_0705505104_9.pdf]
